# Supplementary material
Source: Research Square preprint supplement (doi:10.21203/rs.3.rs-10200020/v1)
Supplement: Supplementary file 1 [file 1a7fdb738258a1023e1285d2.docx]

**Supplemental Table 1. Characteristics of the patients enrolled in the clinical response analysis.**

|  | with a clinical response  (n = 18) | without a clinical response  (n = 10) | SMD | *P* value |
| --- | --- | --- | --- | --- |
| Sex male/female, n | 11/7 | 9/1 | 0.71 | 0.19 |
| Age, years | 81 (75–86) | 85 (68–91) | 0.25 | 0.83 |
| Body mass index, kg/m2 | 21.1 (18.5–23.4) | 22.2 (20.0–23.4) | 0.11 | 0.57 |
| Serum albumin, g/L | 2.6 (2.3–2.8) | 2.4 (2.1–2.7) | 0.21 | 0.50 |
| eGFR, mL/min/1.73m2 | 48.3 (34.5–70.7) | 37.5 (27.1–74.8) | 0.18 | 0.48 |
| Loading dose of teicoplanin, mg/kg | 9.1 (8.4–10.1) | 9.8 (7.7–10.6) | 0.09 | 0.89 |
| Admission to the intensive care unit, n | 4 | 1 | 0.33 | 0.63 |
| Organisms isolated from blood, n |  |  |  |  |
| MRSA | 7 | 5 | 0.23 | 0.70 |
| MRCNS | 9 | 3 | 0.15 | 0.43 |
| *Enterococcus faecium* | 4 | 1 | 0.34 | 0.63 |
| *Corynebacterium sp.* | 1 | 2 | 0.44 | 0.28 |
| Coexisting infectious diseases, n |  |  |  |  |
| Pneumoniae | 2 | 1 | 0.04 | 1.00 |
| Urinary tract infection | 3 | 0 | 0.63 | 0.53 |
| Skin and soft tissue infection | 1 | 0 | 0.34 | 1.00 |
| Intraabdominal infection | 3 | 2 | 0.09 | 1.00 |
| eGFR, estimated glomerular filtration rate; MRSA, methicillin-resistant *Staphylococcus aureus*; MRCNS, methicillin-resistant *coagulase-negative Staphylococcus*.  Data are expressed as the median and interquartile range in parentheses. | | | | |

**Supplemental Table 2. Dose of teicoplanin and the initial trough concentration (Cmin)in 3 groups combined as the control group in the primary analysis**

| subgroup | | n | Dose of teicoplanin  (mg/kg) | *P* value | Cmin (μg/mL) | *P* value |
| --- | --- | --- | --- | --- | --- | --- |
| ONU (Age ≥ 75 and BMI ≥ 18.5 kg/m²) | | 98 | 8.8 (7.7–10.0) | 0.05 | 18.7 (15.5–22.5) | 0.77 |
| NOU (Age < 75 and BMI < 18.5 kg/m²) | | 12 | 10.8 (8.8–11.8) | 20.4 (16.2–23.6) |
| NONU (Age < 75 and BMI ≥ 18.5 kg/m²) | | 49 | 9.0 (7.7–9.8) | 18.9 (16.0–22.8) |
|  | BMI, body mass index; Cmin, the initial trough concentration; NONU, non-older non-underweight; ; NOU, non-older underweight; ONU older non-underweight; OU, older underweight.  Data are expressed as the median and interquartile range in parentheses. Kruskal-Wallis test was conducted. | | | | | |
